# Supplementary material for: Pirfenidone Is a Vasodilator: Involvement of KV7 Channels in the Effect on Endothelium-Dependent Vasodilatation in Type-2 Diabetic Mice
Source: PubMed Central journal article supplement (PMC7906977; doi:10.3389/fphar.2020.619152), 2021-01-12
Supplement: datasheet1.pdf [file datasheet1.pdf]

# Supplementary results

INVOLVEMENT OF VOLTAGE-GATED K<sub>v</sub>7 CHANNELS IN EFFECT OF PIRFENIDONE ON ENDOTHELIUM-DEPENDENT VASODILATATION IN TYPE-2 DIABETIC (db/db) MICE

Lilliana Beck<sup>1,\*</sup>, Estéfano Pinilla<sup>1,2</sup>, Daniel Arcanjo<sup>1,3</sup>, Raquel Hernanz<sup>1,4</sup>, Judit Prat-Duran<sup>1</sup>, Asbjørn Petersen<sup>1</sup>, Ralf Köhler<sup>5</sup>, Majid Sheykhzade<sup>6</sup>, Simon Comerma-Steffensen<sup>1,7</sup>, and Ulf Simonsen<sup>1,#</sup>

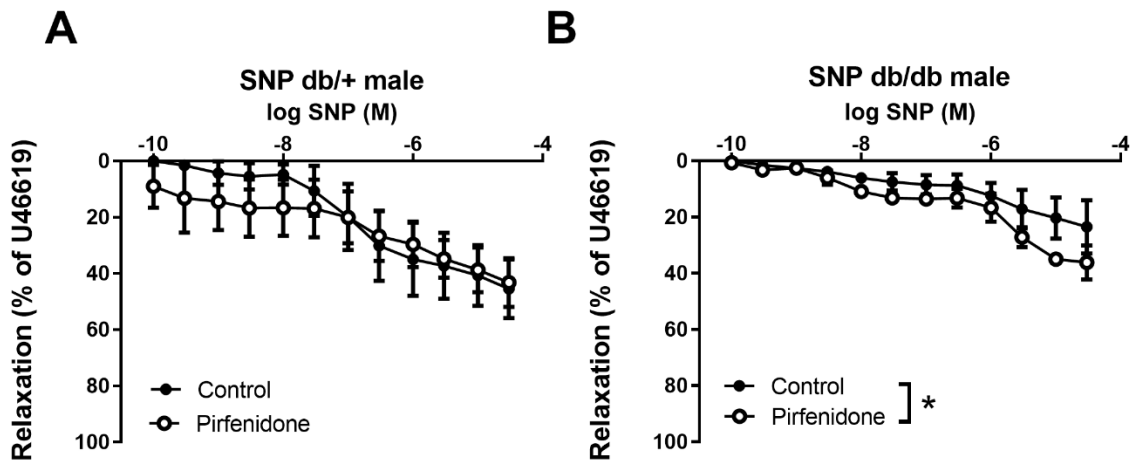

**Supplementary Figure S1. Effect of pirfenidone on sodium nitroprusside relaxations in left anterior descending coronary arteries (LAD) from male normoglycemic control (db/db+) and diabetic (db/db) mice.** Average relaxations induced by the nitric oxide donor, sodium nitroprusside (SNP) in the absence and the presence of pirfenidone in U46619- contracted coronary arteries from (a) db/db+ (n = 6) (b) db/db mice (n = 3). The results are means  $\pm$  s.e.mean, where n indicates the number of animals examined. \*P<0.05 versus control curves, two-way ANOVA.

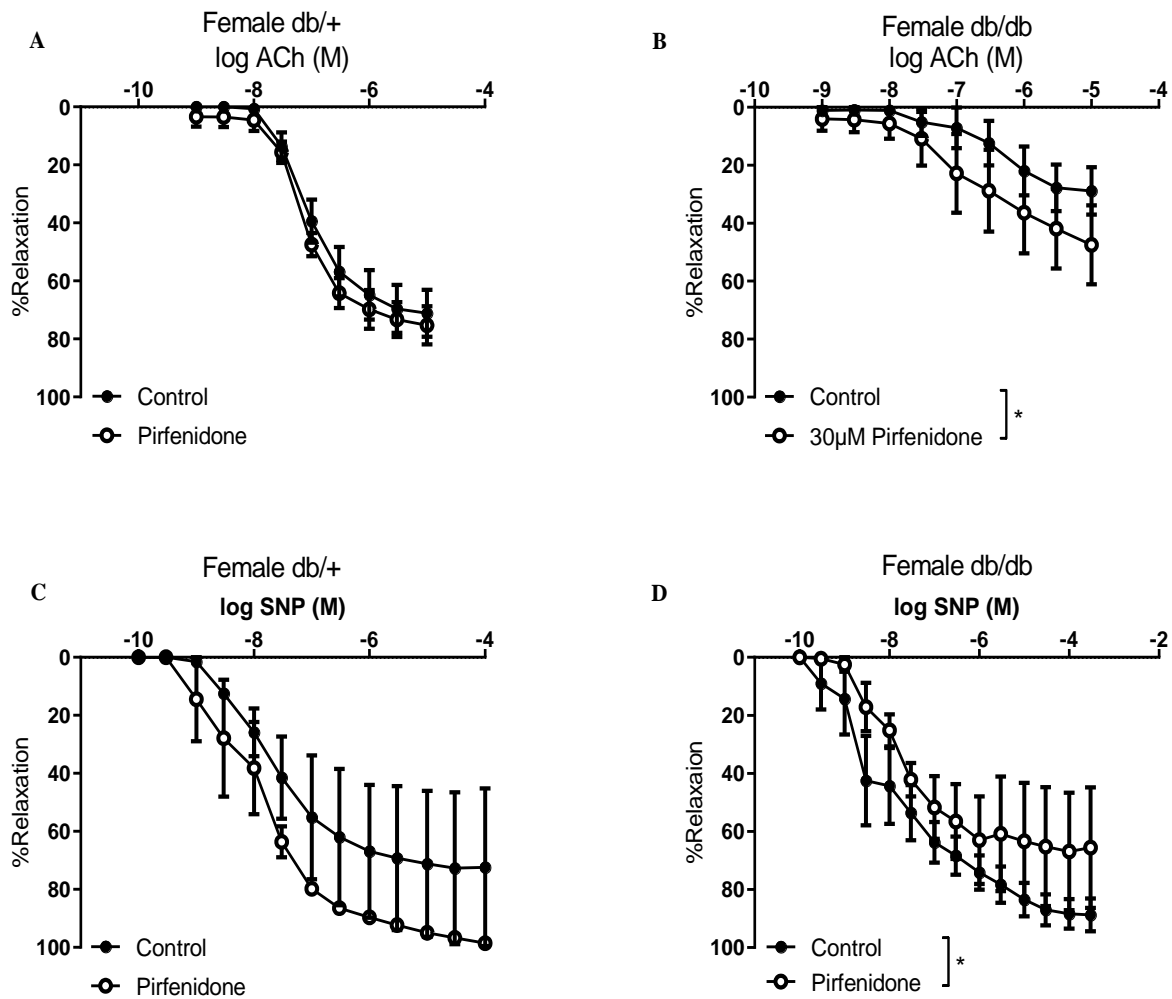

**Supplementary Figure S2. Effect of pirfenidone on acetylcholine and sodium nitroprusside relaxations in aorta from female diabetic mice.** Pirfenidone enhances acetylcholine relaxation in aorta from female diabetic mice. Average relaxations induced by the endothelium-dependent vasodilator, acetylcholine in the absence and the presence of pirfenidone in phenylephrine-contracted aorta segments arteries from (A) heterozygous control (db/db+) (n = 7) and (B) diabetic (db/db) mice (n = 6). Average relaxations induced by the nitric oxide donor, sodium nitroprusside (SNP) in the absence and the presence of pirfenidone in phenylephrine-contracted aorta segments arteries from (C) db/db+ (n = 6) and (D) db/db mice (n = 5). The results are means  $\pm$  s.e.mean, where n indicates the number of animals examined. \*P<0.05 versus respective control curves, two-way ANOVA.

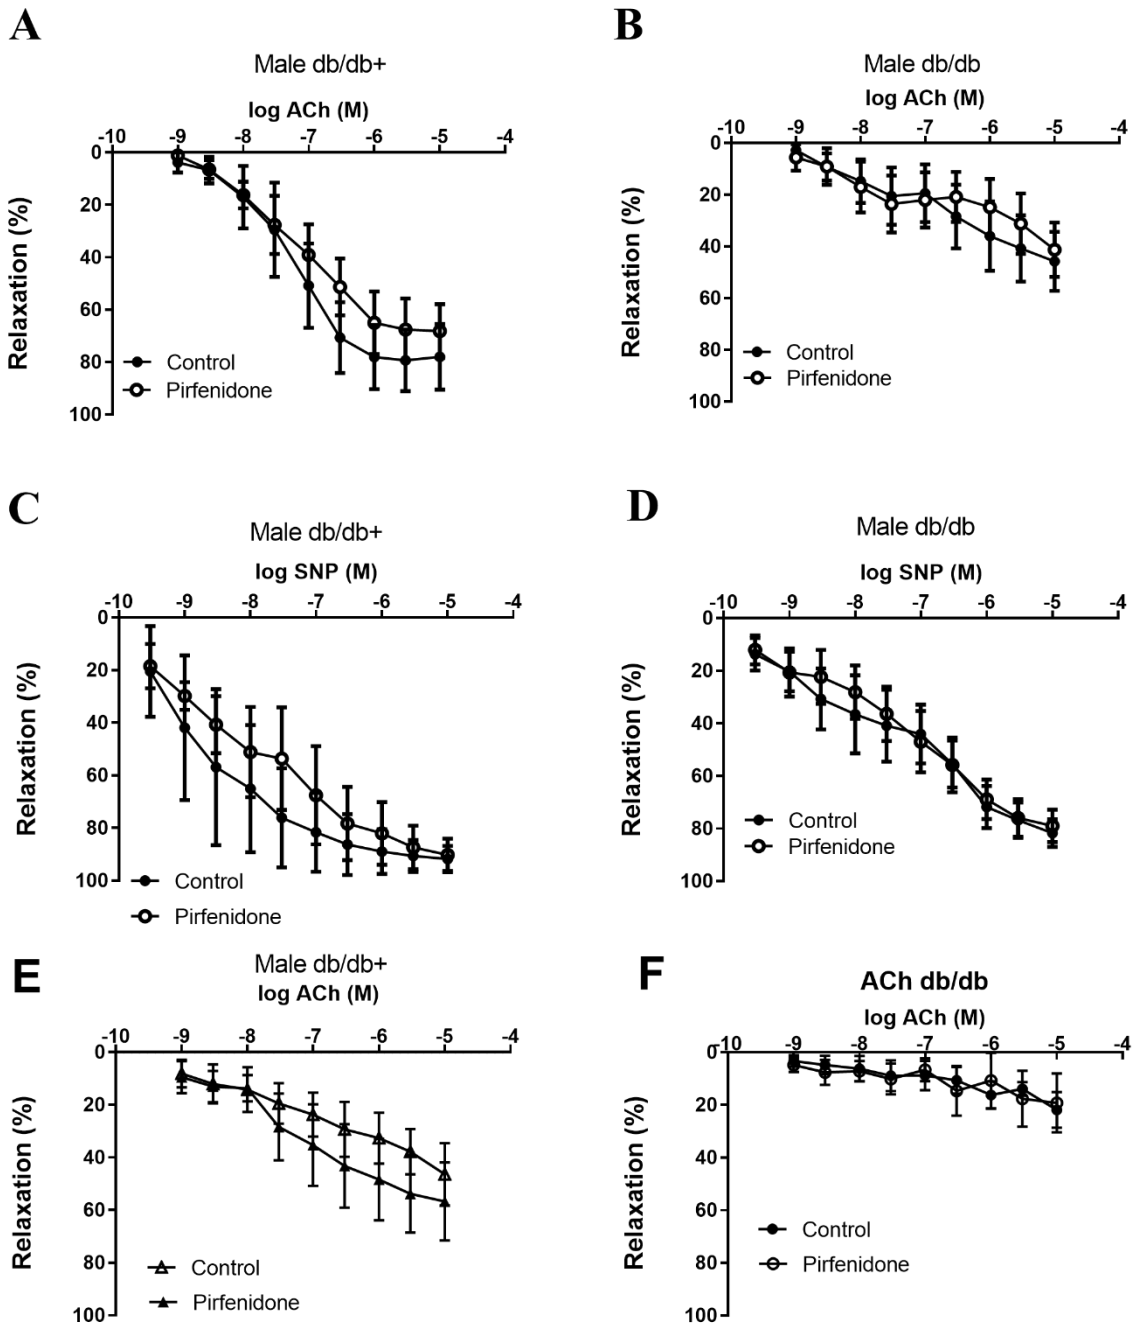

**Supplementary Figure S3. Lack of effect of pirfenidone on acetylcholine relaxations in mesenteric small arteries from male diabetic mice.** Average relaxations induced by the endothelium-dependent vasodilator, acetylcholine in the absence and the presence of pirfenidone ( $3 \times 10^{-5}$  M) in phenylephrine-contracted mesenteric arteries from (A) heterozygous control (db/+) ( $n = 4$ ) and (B) diabetic (db/db) mice ( $n = 6$ ). Average relaxations induced by the nitric oxide donor, sodium nitroprusside (SNP) in the absence and the presence of pirfenidone in phenylephrine-contracted mesenteric arteries from (C) db/+ ( $n = 6$ ) and (D) db/db mice ( $n = 7$ ). Average relaxations to acetylcholine obtained in the presence of L-NOARG plus indomethacin in the absence or the presence of pirfenidone in mesenteric arteries from (E) db/db+ ( $n = 5$ ) and

(F) db/db mice (n=5). The results are means  $\pm$  s.e.mean, where n indicates the number of animals examined. \*P<0.05 versus respective control curves, two-way ANOVA.

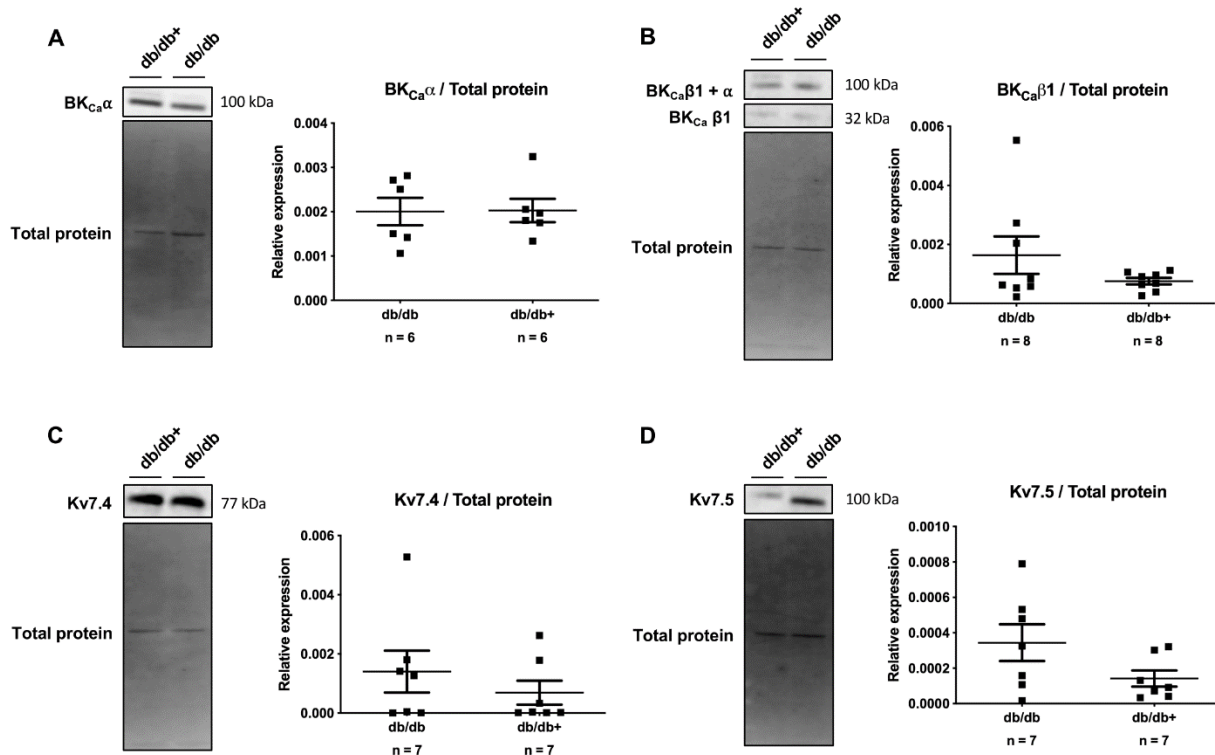

**Supplementary Figure S4. Immunoblots in mouse aorta expressed relative to total protein.**

The Figures show inserts of original immunoblottings and average values expressed as ratio to the total protein for: (A) BK<sub>Ca</sub>α, (B) BK<sub>Ca</sub>β1, (C) Kv7.4, and (D) Kv7.5. The results are means  $\pm$  s.e.mean from heterozygote db/db+ control mice (n=6) and diabetic db/db (n=6) mice. There were no significant differences.
